# Supplementary material for: Lipidomic QTL in Diversity Outbred mice identifies a novel function for α/β hydrolase domain 2 (Abhd2) as an enzyme that metabolizes phosphatidylcholine and cardiolipin
Source: PLoS Genet. 2023 Jul 31;19(7):e1010713. doi: 10.1371/journal.pgen.1010713 (PMC10414554; doi:10.1371/journal.pgen.1010713)
Supplement: S2 Table — (XLSX) [file pgen.1010713.s011.xlsx]

## Sheet: Sheet1
S2 Table. 37 lipid classes were detected by untargeted MS-based lipidomics in hepatic tissue of WT and ABHD2KO mice.
Lipid Class (pmol/mg tissue)	Species Count	F WT	F KO	p-value		Lipid Class (pmol/mg tissue)	Species Count	M WT	M KO	p-value
Acar	6	27.4 + 2.39	26.2 + 2.69	0.7472		Acar	6	42.0 + 2.08	20.1 + 4.60	0.0025
Cer	29	909 + 107	783 + 83.	0.3793		Cer	29	869 + 113	100 + 155	0.5134
CerP	2	5.43 + 0.37	5.28 + 0.23	0.7373		CerP	2	3.78 + 0.56	4.44 + 0.45	0.3963
CL	16	393 + 9.59	346 + 29.6	0.1683		CL	16	393 + 38.6	369 + 40.2	0.6797
DG	55	8373 + 991	7162 + 108	0.433		DG	55	2792 + 581	1836 + 542	0.2634
DMPE	1	1.59 + 0.20	1.44 + 0.16	0.5776		DMPE	1	1.75 + 0.25	2.03 + 0.30	0.5081
EtherPC	9	134 + 19.4	108 + 4.88	0.2375		EtherPC	9	100 + 9.46	113 + 7.52	0.3176
EtherPE	1	4.37 + 0.48	3.51 + 0.17	0.1324		EtherPE	1	3.77 + 0.44	3.91 + 0.43	0.8281
FA	11	3123 + 374	3002 + 256	0.7959		FA	11	4810 + 849	5106 + 451	0.7662
GlcADG	1	6.26 + 0.81	5.22 + 1.08	0.4648		GlcADG	1	14.1 + 3.37	5.26 + 1.89	0.05
HexCer	6	125 + 26.3	90. + 7.76	0.2394		HexCer	6	98. + 13.5	78. + 13.6	0.3102
LPC	17	394 + 32.5	340 + 29.4	0.2555		LPC	17	323 + 18.4	346 + 35.4	0.5774
LPE	10	213 + 25.5	167 + 32.5	0.3063		LPE	10	238 + 37.8	277 + 49.8	0.5439
LPI	5	47.2 + 3.96	47.1 + 8.97	0.9917		LPI	5	60.0 + 4.86	74.9 + 12.2	0.2911
LPS	4	1.55 + 0.10	1.70 + 0.17	0.4918		LPS	4	1.27 + 0.14	1.62 + 0.26	0.2745
MG	2	0.20 + 0.03	0.15 + 0.05	0.4118		MG	2	0.59 + 0.12	0.33 + 0.06	0.1114
OxLPC	1	0.37 + 0.07	0.42 + 0.14	0.7699		OxLPC	1	0.44 + 0.10	0.28 + 0.04	0.2212
OxPE	1	0.82 + 0.07	0.59 + 0.08	0.0763		OxPE	1	0.50 + 0.10	0.93 + 0.32	0.2434
OxTG	10	25.7 + 5.32	28.9 + 6.47	0.7113		OxTG	10	125. + 28.7	69.3 + 27.5	0.1954
PA	18	183 + 15.1	176 + 5.73	0.6608		PA	18	199 + 12.8	148 + 9.68	0.0129
PC	67	34905 + 1681	31431 + 2051	0.2266		PC	67	41378 + 4104	36193 + 3850	0.3838
PE	50	13315 + 774	11513 + 704	0.1235		PE	50	12420 + 149	13458 + 158	0.6465
PEtOH	2	32.1 + 9.74	19.2 + 2.96	0.2416		PEtOH	2	27.2 + 5.95	27.8 + 7.19	0.9512
PG	41	504 + 80.9	402 + 42.6	0.2948		PG	41	736 + 112.	410 + 20.8	0.021
PI	24	2076 + 143	2031 + 70.	0.7868		PI	24	2511 + 237	2497 + 174	0.9618
Plasmanyl-PC	2	13.4 + 1.64	11.7 + 0.37	0.3588		Plasmanyl-PC	2	11.3 + 0.66	12.9 + 1.61	0.3851
Plasmanyl-PE	5	13.0 + 1.40	9.75 + 0.32	0.0536		Plasmanyl-PE	5	10.4 + 1.74	10.3 + 1.11	0.9614
plasmanyl-TG	5	24.7 + 1.95	18.8 + 1.15	0.0312		plasmanyl-TG	5	21.9 + 3.31	18.6 + 3.59	0.5174
Plasmenyl-PE	16	487 + 46.6	421 + 17.1	0.2196		Plasmenyl-PE	16	414 + 33.2	348 + 7.33	0.0856
Plasmenyl-PS	4	12.1 + 0.59	13.0 + 0.99	0.4754		Plasmenyl-PS	4	13.2 + 2.23	13.9 + 2.07	0.8135
PMeOH	5	111 + 27.4	63. + 6.79	0.1272		PMeOH	5	76. + 21.5	78. + 17.2	0.9282
PS	32	4101 + 320	3467 + 159	0.114		PS	32	4112 + 465	4032 + 527	0.9126
SM	28	1433 + 79.2	1159 + 90.7	0.0529		SM	28	1277 + 239.	1462 + 189.	0.5625
So	2	2.31 + 0.27	1.88 + 0.06	0.171		So	2	2.15 + 0.19	1.68 + 0.18	0.1235
ST	1	262 + 19.4	208 + 21.2	0.0973		ST	1	131 + 21.9	156 + 26.8	0.498
TG	93	164619 + 30657	193535 + 37695	0.5682		TG	93	722305 + 16686	403816 + 16768	0.2151
VAE	1	3.52 + 0.43	3.30 + 0.34	0.6989		VAE	1	3.79 + 0.93	3.13 + 0.66	0.5819
TOTAL	583	235891 + 32952	256611 + 38817	0.6947		TOTAL	583	820669 + 16589	488530 + 16765	0.1967
PC/PE		2.62 + 0.04	2.72 + 0.07	0.2692		PC/PE		3.37 + 0.16	2.75 + 0.26	0.0801
