# Supplementary material for: Lipidomic QTL in Diversity Outbred mice identifies a novel function for α/β hydrolase domain 2 (Abhd2) as an enzyme that metabolizes phosphatidylcholine and cardiolipin
Source: PLoS Genet. 2023 Jul 31;19(7):e1010713. doi: 10.1371/journal.pgen.1010713 (PMC10414554; doi:10.1371/journal.pgen.1010713)
Supplement: S8 Table — (XLSX) [file pgen.1010713.s017.xlsx]

## Sheet: Sheet1
Table S8. Antibodies and source for western blot analyses
Antibody	Vendor
rabbit a-Abhd2	Proteintech (14039-1-AP)
rabbit a-LDL receptor	Attie Lab (antisera)
rabbit a-apoB	Attie Lab (antisera)
a-rabbit IgG, HRP-linked	Cell Signaling Technologies (#7074S)
